# Supplementary material for: NECTIN4 Expression in Extramammary Paget’s Disease: Implication of a New Therapeutic Target
Source: PubMed Central journal article supplement (PMC7460664; doi:10.3390/ijms21165891), 2020-08-16
Supplement: ijms-21-05891-s001.pdf [file ijms-21-05891-s001.pdf]

## Supplementary Figure S1

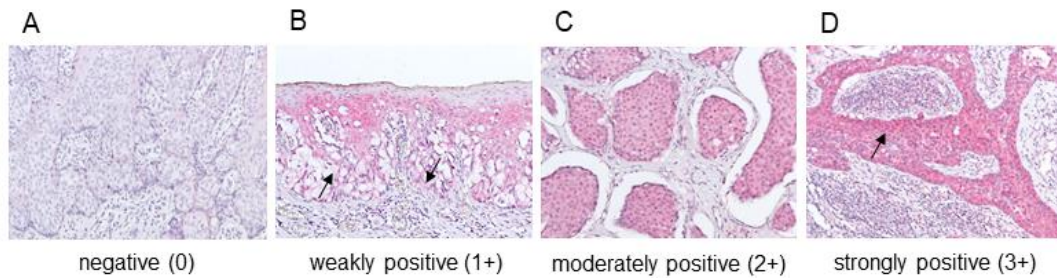

**Supplementary Figure S1.** Staining intensity of the nectin cell adhesion molecule 4 (NECTIN4) antibody. Positive signals are indicated by red. (A) Negative staining (0), (B) weakly positive staining (1+), (C) moderately positive staining (2+), and (D) strongly positive staining (3+).

## Supplementary Figure S2

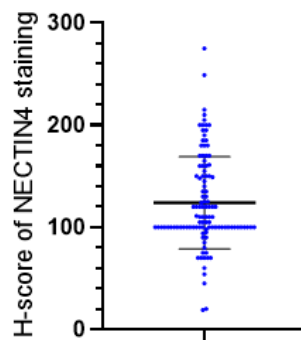

**Supplementary Figure S2.** H-score for nectin cell adhesion molecule 4 (NECTIN4) staining in extramammary Paget's disease.
